# Supplementary material for: Fur Represses Vibrio cholerae Biofilm Formation via Direct Regulation of vieSAB, cdgD, vpsU, and vpsA-K Transcription
Source: PubMed Central journal article supplement (PMC7641913; doi:10.3389/fmicb.2020.587159), 2020-10-22
Supplement: Data_Sheet_1.pdf [file Data_Sheet_1.pdf]

**Table S1. Oligonucleotide primers used in this study**

| Target                                      | Primers (forward/reverse, 5'-3')                                             |
|---------------------------------------------|------------------------------------------------------------------------------|
| <b>Construction of mutants</b>              |                                                                              |
| <i>fur</i>                                  | CGGGATCCTTCGTGTAAGGCAGCAGTAATC/CAGAGCGTAAAGCCTATG<br>GATACTTTCTGTTGATGTTC    |
|                                             | GAACATCAACAGGAAAGTATCCATAGGCTTTACGCTCTG/GGACTAGTAG<br>ATGAAGATGGTGTGGGAAAC   |
|                                             | CGGGATCCTTCGTGTAAGGCAGCAGTAATC/GGACTAGTAGATGAAGAT<br>GGTGTGGGAAAC            |
| <b>Construction of complemented mutants</b> |                                                                              |
| <i>fur</i>                                  | GATTCTAGAAGGAGGAATTCACCATGTCAGACAATAACCAAG/GCGAAG<br>CTTTTATTTCTTCGGCTTGTGAG |
| <b>Protein expression</b>                   |                                                                              |
| <i>fur</i>                                  | GCGGGATCCATGTCAGACAATAACCAAG/GCGAAGCTTTTATTTCTTCGG<br>CTTGTGAG               |
| <b>qPCR</b>                                 |                                                                              |
| <i>vieS</i>                                 | AAGCAGCGAAAGCCAACCT/CTTCAAATCCACGCAATAA                                      |
| <i>cdgD</i>                                 | GATTTACGATGGGCACCA/TTCACCGTCACGACAAGA                                        |
| <i>vpsA</i>                                 | TGATGCGTTGTTGGCTGTG/TGCTGCTCTGCGGTAGTG                                       |
| <i>vpsU</i>                                 | CACGCTAAAGACAGGAAA/TGCTCAGCAGGACAAATA                                        |
| <i>recA</i>                                 | AAGATTGGTGTGATGTTGGTA/CACTTCTTCGCCTTCTTTGA                                   |
| <b>Primer extension</b>                     |                                                                              |
| <i>cdgD</i>                                 | /AACCAAGTACAAACGCAAC-HEX                                                     |

| <b>Luminescence assay</b>   |                                                                                 |
|-----------------------------|---------------------------------------------------------------------------------|
| <i>vieS</i>                 | GCGGAGCTCCGCCTAACGAGATGCTGT/GCGACTAGTCCTATCGGCTCCT<br>GACCT                     |
| <i>cdgD</i>                 | GCGGAGCTCATCTCAGGTTTGGCTTCG/GCGGGATCCATGAGATTTTCGCT<br>TCCAG                    |
| <i>vpsA</i>                 | GCGGAGCTCCAATGGATAGGACCAATC/GCGGGATCCCCAAATACGATG<br>AGAAC                      |
| <i>vpsU</i>                 | GCGACTAGTTGTATCGCTTGATTTCCG/GCGGGATCCACCCTAACTACGC<br>ACATG                     |
| <b>EMSA</b>                 |                                                                                 |
| <i>vieS</i>                 | GATGATTATGCACTCGATG/ATACCCTAACTACGCACATG                                        |
| <i>cdgD</i>                 | TGGCTCTTTTTCTTAGCAAG/TTCGTCGTTATAAACAATC                                        |
| <i>vpsA</i>                 | ATCTCAGGTTTGGCTTCG/AGCATGAAGTGTGCCTTTAC                                         |
| <i>vpsU</i>                 | CTTCTGTAGGAATTTTCTCTC/CCTATCGGCTCCTGACCT                                        |
| <i>recA</i>                 | AAGATTGGTGTGATGTTTGGTA/CACTTCTTCGCCTTCTTTGA                                     |
| <b>DNase I footprinting</b> |                                                                                 |
| <i>vieS</i>                 | GTAAAACGACGGCCAGTCTTCTGTAGGAATTTTCTCTC/CAGGAAACAGC<br>TATGACCCTATCGGCTCCTGACCT  |
| <i>cdgD</i>                 | GTAAAACGACGGCCAGTATCTCAGGTTTGGCTTCG/CAGGAAACAGCTAT<br>GACAGCATGAAGTGTGCCTTTAC   |
| <i>vpsA</i>                 | GTAAAACGACGGCCAGTTGGCTCTTTTTCTTAGCAAG/CAGGAAACAGCT<br>ATGACTTCGTCGTTATAAACAATC  |
| <i>vpsU</i>                 | GTAAAACGACGGCCAGTGATGATTATGCACTCGATG/CAGGAAACAGCT<br>ATGACATAACCCTAACTACGCACATG |

|                |                                               |
|----------------|-----------------------------------------------|
| M13            | FAM-GTAAAACGACGGCCAGT/CAGGAAACAGCTATGAC-HEX   |
| <b>5'-RACE</b> |                                               |
| <i>vpsA</i>    | /GGTGCAAAGTGGTACTGCGTGAGTGC                   |
|                | /GTATCTGTAGGTGCAAAGTGGTACTG                   |
| <i>vpsU</i>    | /CACTACTACGCCGATAAGGATCGG                     |
|                | /GCCACCGCTCCAGATTCAATCAAC                     |
| UPM-Long       | CTAATACGACTCACTATAGGGCAAGCAGTGGTATCAACGCAGAGT |
| UPM-Short      | CTAATACGACTCACTATAGGGC                        |

**Table S2. Predicted Fur box-like sequences within target promoters**

| Operon        | First gene  | Fur box-like sequence     |                     |       |
|---------------|-------------|---------------------------|---------------------|-------|
|               |             | Position <sup>&amp;</sup> | Sequene             | Score |
| <i>vieSAB</i> | <i>vieS</i> | D-135...-117              | AACGATATTTCTTTACATT | 9.3   |
|               | <i>cdgD</i> | D-376...-358              | CATGAGTATTTTTTTCATT | 8.5   |
| <i>vpsA-K</i> | <i>vpsA</i> | D-334...-316              | AACGAAAATTTATCTCAAT | 9.9   |
|               | <i>vpsU</i> | D-150...-132              | AAATAAACTACTTTCATT  | 7.2   |

&, 'D' indicates the direct sequence; minus numbers denote the nucleotide positions upstream of the translation start sites of indicated genes.
